# Supplementary material for: Reduced Plasma Levels of 25-Hydroxycholesterol and Increased Cerebrospinal Fluid Levels of Bile Acid Precursors in Multiple Sclerosis Patients
Source: PubMed Central journal article supplement (PMC5684259; doi:10.1007/s12035-016-0281-9), 2016-11-23

# ESM\_12 (Griffiths)

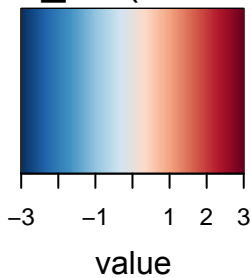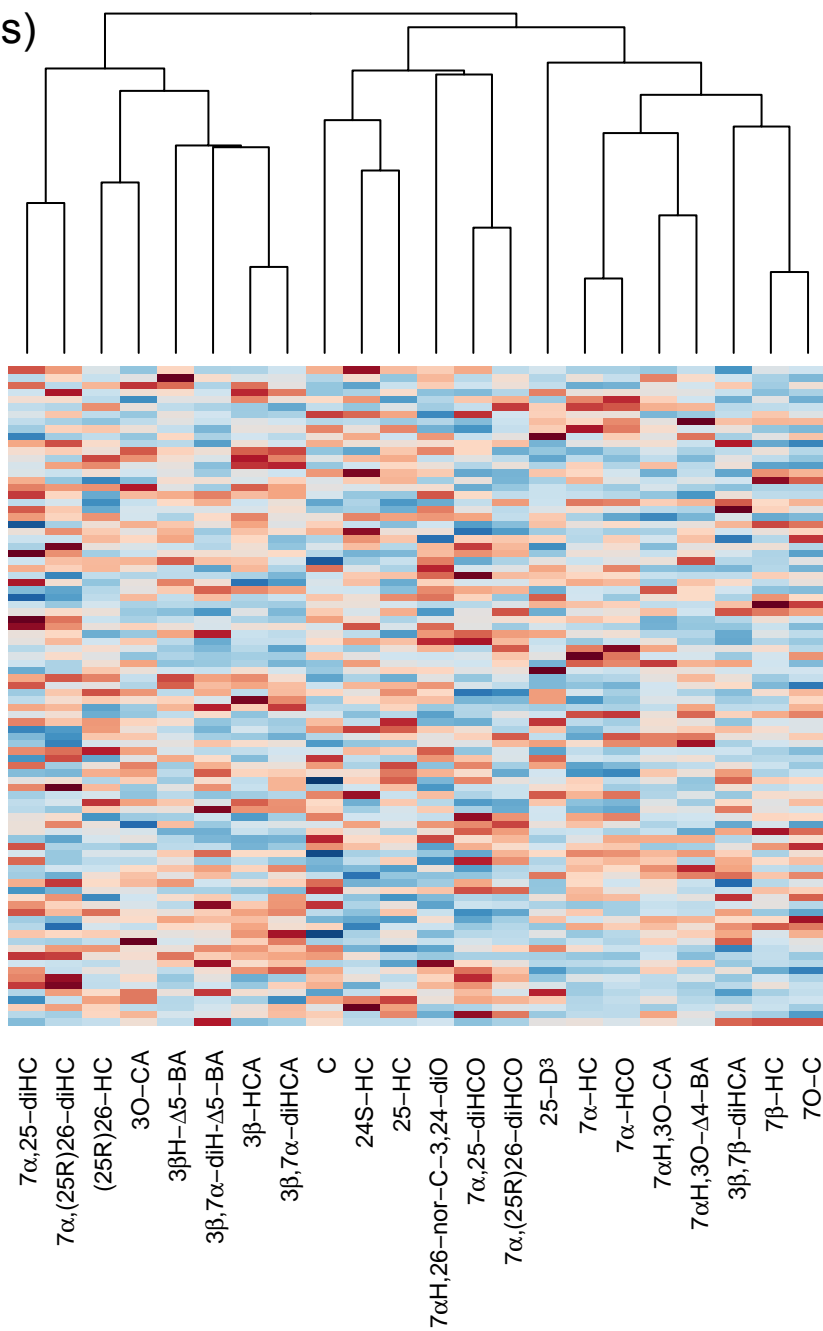

Supplement: 12035_2016_281_MOESM12_ESM.pdf [file 12035_2016_281_MOESM12_ESM.pdf]
